# Supplementary material for: Identification of novel mazEF/pemIK family toxin-antitoxin loci and their distribution in the Staphylococcus genus
Source: PubMed Central journal article supplement (PMC5647390; doi:10.1038/s41598-017-13857-4), 2017-10-18
Supplement: 41598_2017_13857_MOESM1_ESM.pdf [file 41598_2017_13857_MOESM1_ESM.pdf]

1 **Identification of novel *mazEF/pemIK* family toxin-antitoxin loci and their**  
2 **distribution in the *Staphylococcus* genus**

3  
4 Michal Bukowski<sup>1</sup>, Karolina Hyz<sup>1</sup>, Monika Janczak<sup>1</sup>, Marcin Hydzik<sup>1</sup>, Grzegorz Dubin<sup>2,3</sup>,  
5 Benedykt Wladyka<sup>1,#</sup>

6  
7 <sup>1</sup>Department of Analytical Biochemistry, Faculty of Biochemistry, Biophysics and  
8 Biotechnology, Jagiellonian University, Krakow, Poland

9 <sup>2</sup>Malopolska Centre of Biotechnology, Jagiellonian University, Krakow, Poland

10 <sup>3</sup>Department of Microbiology, Faculty of Biochemistry, Biophysics and Biotechnology,  
11 Jagiellonian University, Krakow, Poland

12  
13 **#Corresponding author:**

14 Benedykt Wladyka

15 Department of Analytical Biochemistry

16 Faculty of Biochemistry, Biophysics and Biotechnology

17 Jagiellonian University

18 7 Gronostajowa St, 30-387 Krakow, Poland

19 phone: +48 12 664 65 11

20 fax: +48 12 664 69 15

21 e-mail: benedykt.wladyka@uj.edu.pl

22  
23 **Keywords:** *mazEF*, mRNA interferase, *pemIK*, staphylococci, *Staphylococcus*, *Staphylococcus aureus*, TA  
24 system, toxin-antitoxin system

25  
26  
27 **SUPPLEMENTARY DATA**

28  
29 Supplementary note on construction of phylogenetic trees..... 2  
30 Supplementary figure 1..... 3  
31 Supplementary figure 2..... 4  
32 Supplementary figure 3..... 5  
33 Supplementary figure 4..... 6  
34 Supplementary figure 5..... 7  
35 Supplementary figure 6..... 8  
36 Bibliography..... 9

37

38 **Supplementary note on construction of phylogenetic trees.** The following parameters  
39 were used for multiple sequence alignments of DNA sequences; gap open cost: 20.0; gap  
40 extension cost: 1.0; end gap cost: free; alignment mode: very accurate; and the following  
41 ones for protein sequences; gap open cost: 10.0; gap extension cost: 1.0; end gap cost:  
42 free; alignment mode: very accurate. For DNA sequences the model choice and  
43 parameters were as following; construction method: neighbour joining [1]; nucleotide  
44 substitution model: general time reversible, GTR [2]; transition/transversion ratio: 2.0;  
45 include rate variation: yes; number of substitution rate categories: 8; gamma distribution  
46 parameter: 1.0; estimate substitution rate parameters, topology and gamma distribution  
47 parameter: yes; bootstrap analysis with 100 replicates; and for protein sequences as  
48 following; construction method: neighbour joining [1]; protein substitution model: WAG [3];  
49 transition/transversion ratio: 2.0; include rate variation: yes; number of substitution rate  
50 categories: 8; gamma distribution parameter: 1.0; estimate substitution rate parameters,  
51 topology and gamma distribution parameter: yes; bootstrap analysis with 100 replicates.  
52 Prototypical protein sequences of all MazF/PemK toxins were aligned with the following  
53 parameters: gap open cost: 20.0; gap extension cost: 1.0; end gap cost: as any other;  
54 alignment mode: very accurate; and visualised using CLC Main Workbench.

55

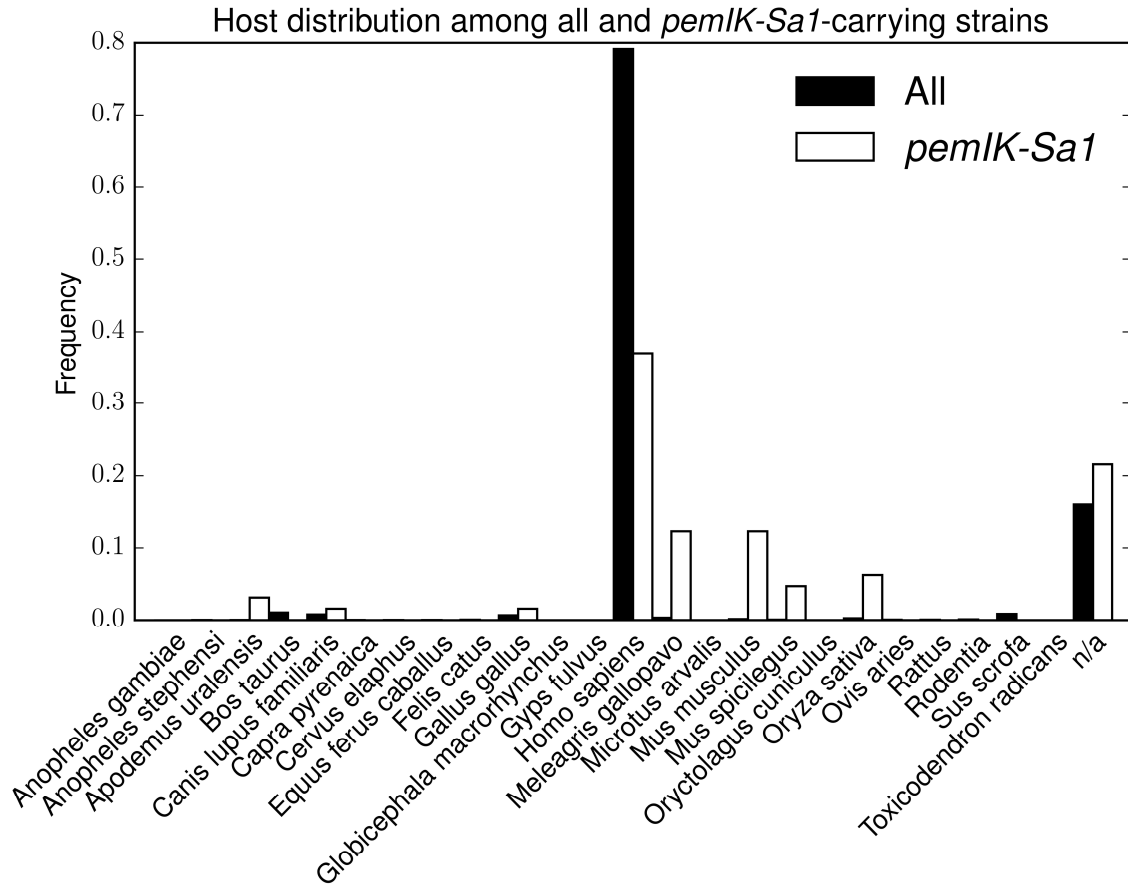

56 **Suppl. fig. 1.** Host distribution of *pemIK-Sa1* loci.  
 57

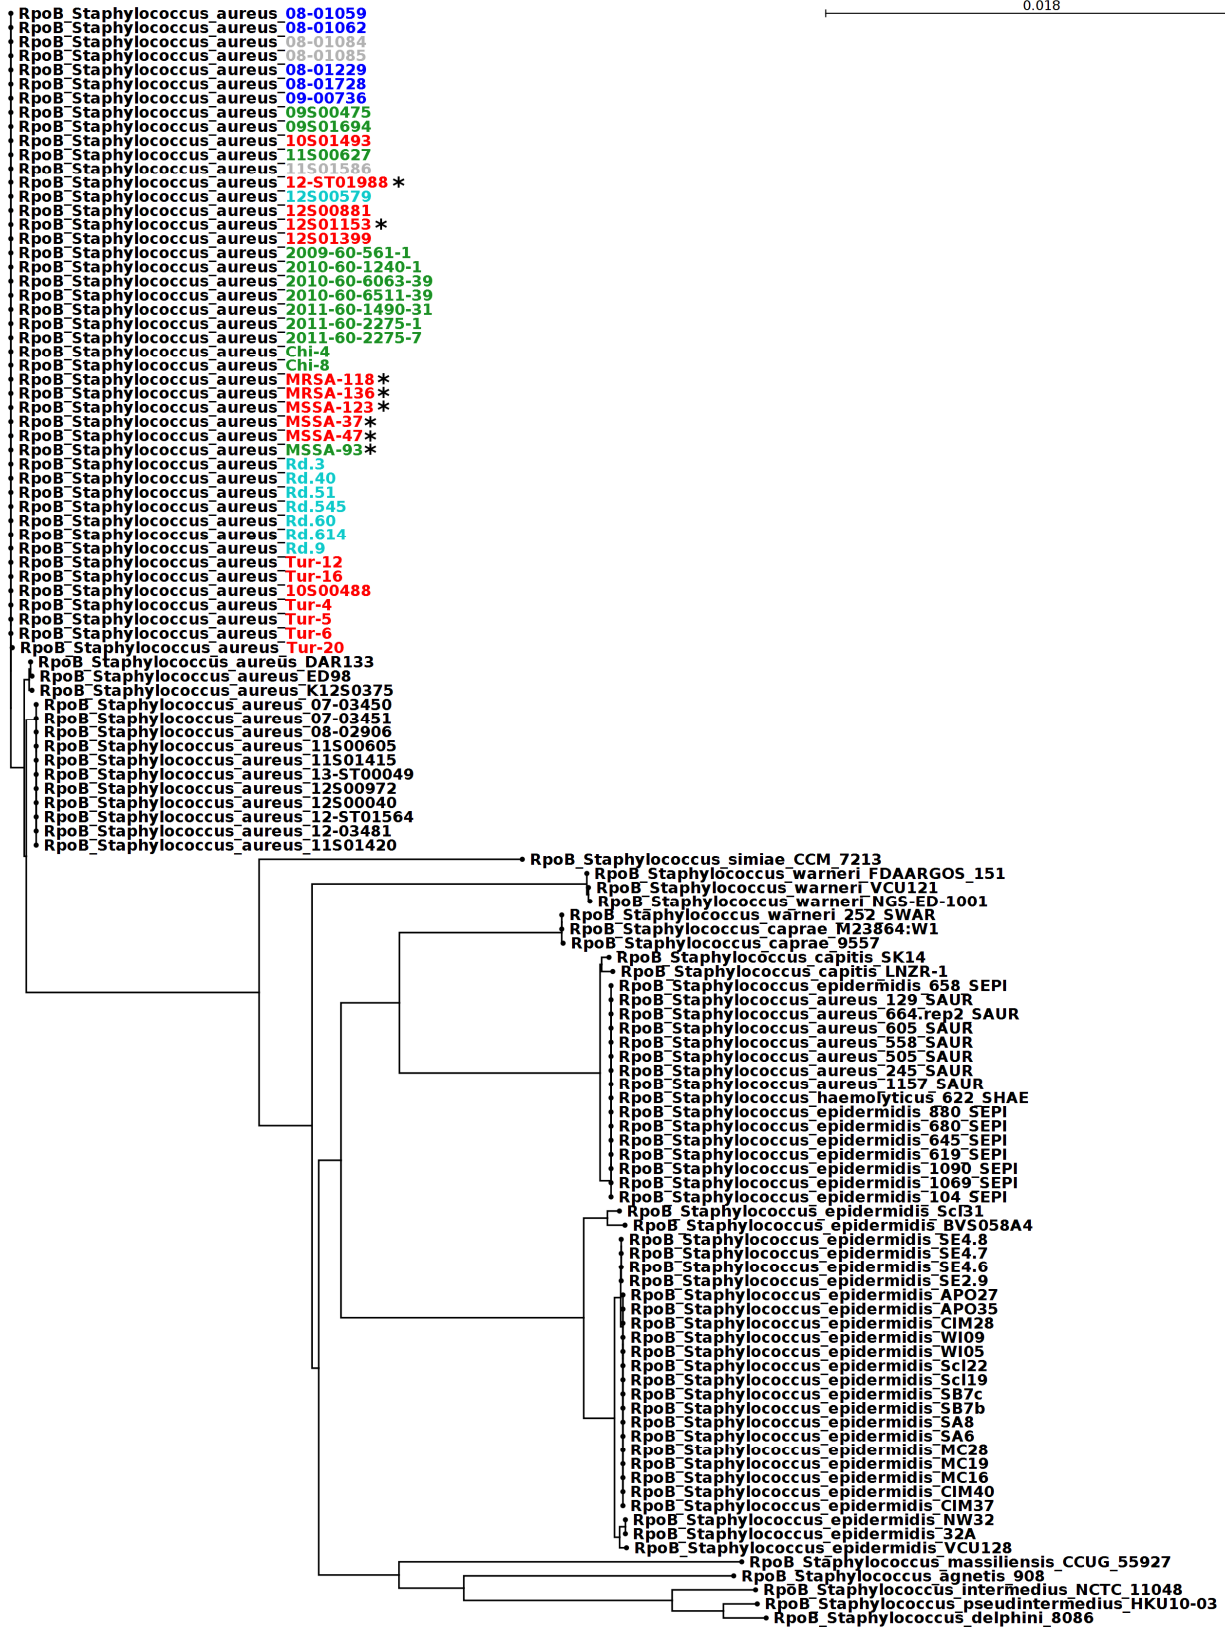

58 **Suppl. fig. 2.** Phylogenetic tree based on gapless alignment of *rpoB* gene sequences derived from strains  
 59 isolated in Germany and all strains possessing *pemIK-Sa1* locus. Colours of signatures of closely related  
 60 strains denote the host: unknown, light grey; *Bos taurus*, skyblue; *Gallus gallus*, green; *Homo sapiens*, blue;  
 61 *Meleagris gallopavo*, red. The *pemIK-Sa1*-carrying strains are marked with asterisk.  
 62

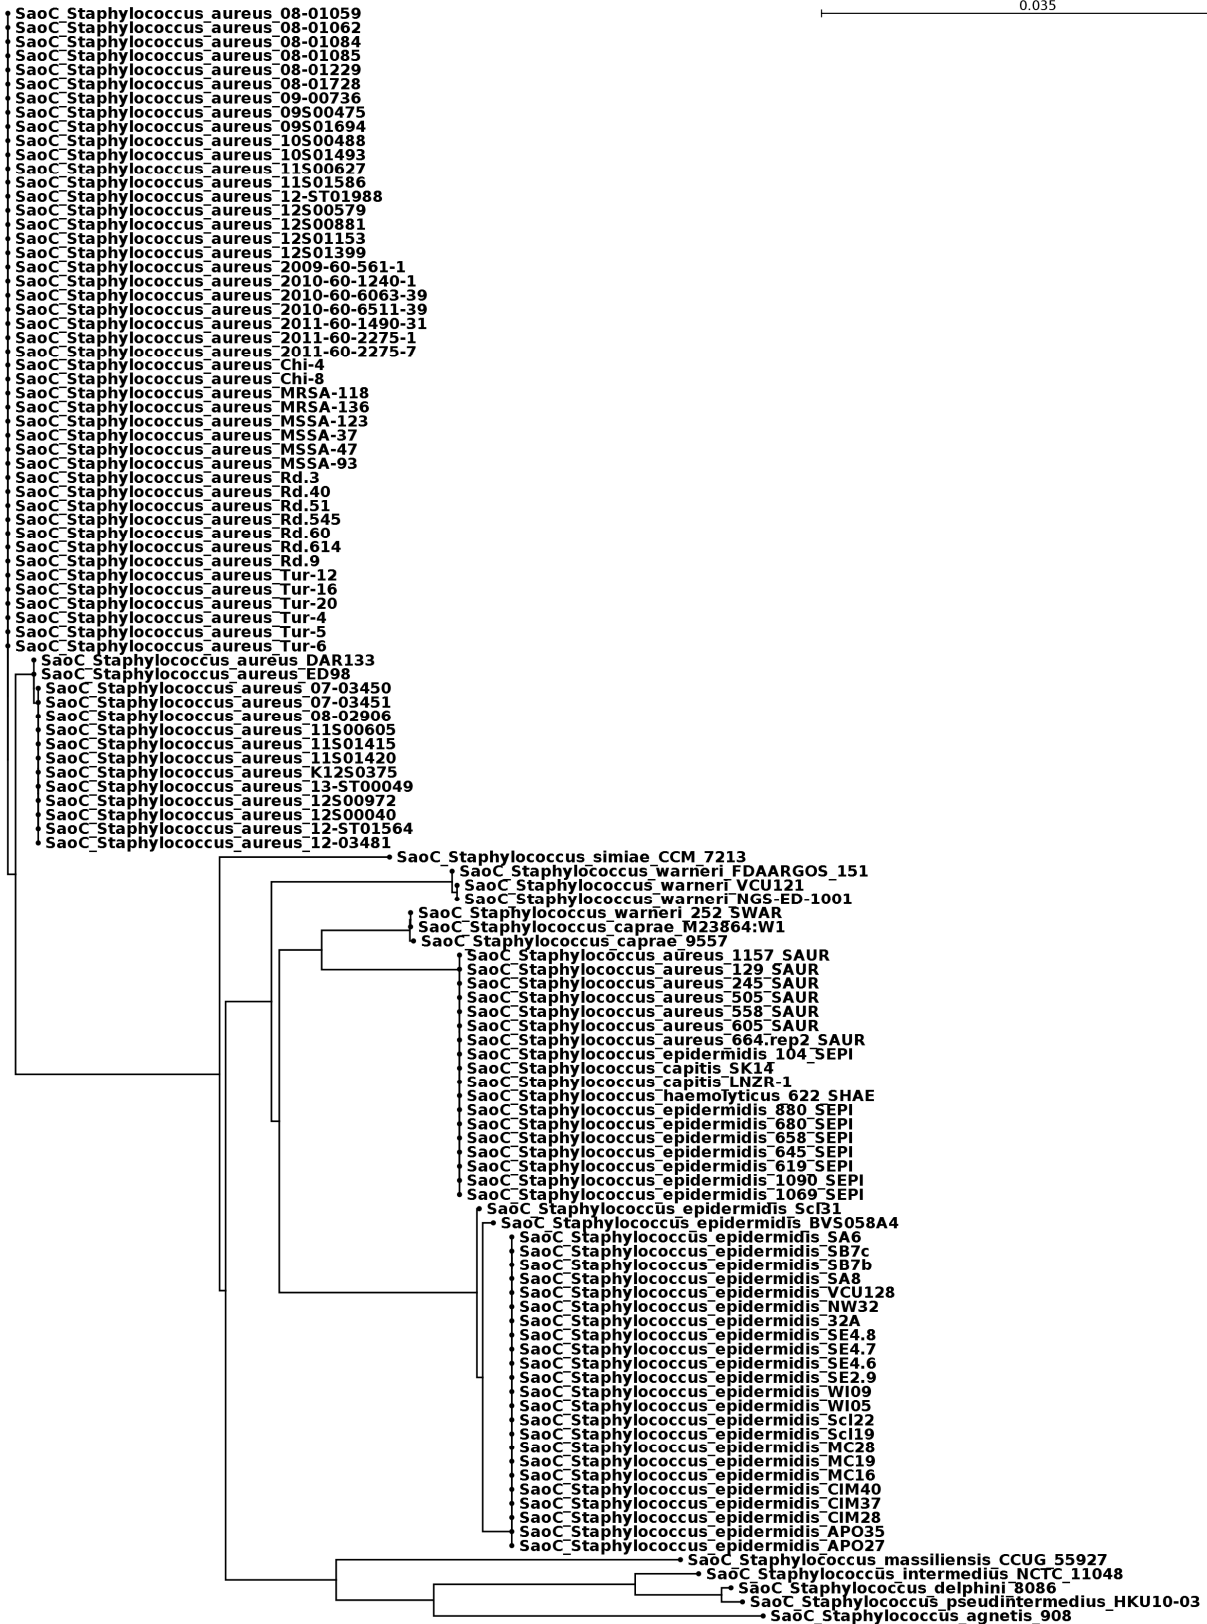

63 **Suppl. fig. 3.** Phylogenetic tree based on gapless alignment of *saoC* gene sequences derived from strains  
 64 isolated in Germany and all strains possessing *pemK-Sa1* locus.  
 65

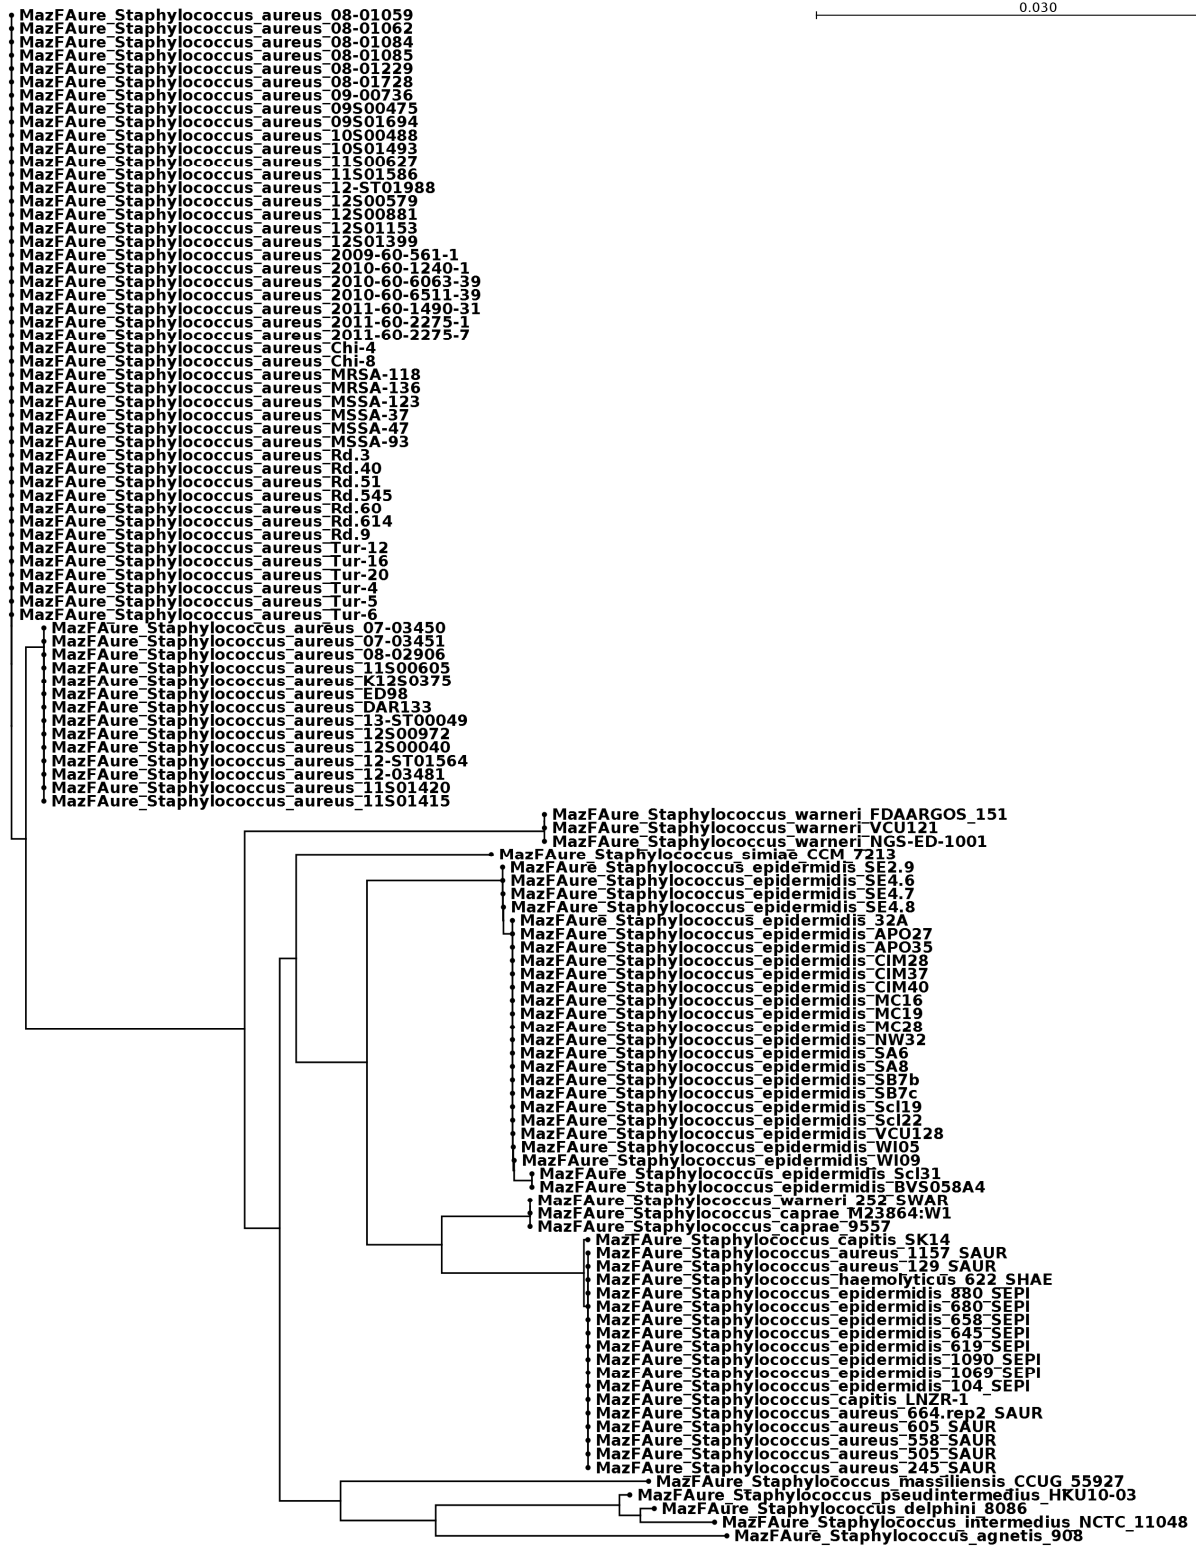

66 **Suppl. fig. 4.** Phylogenetic tree based on gapless alignment of *mazF* gene sequences derived from strains  
 67 isolated in Germany and all strains possessing *pehK-Sa1* locus.  
 68  
 69

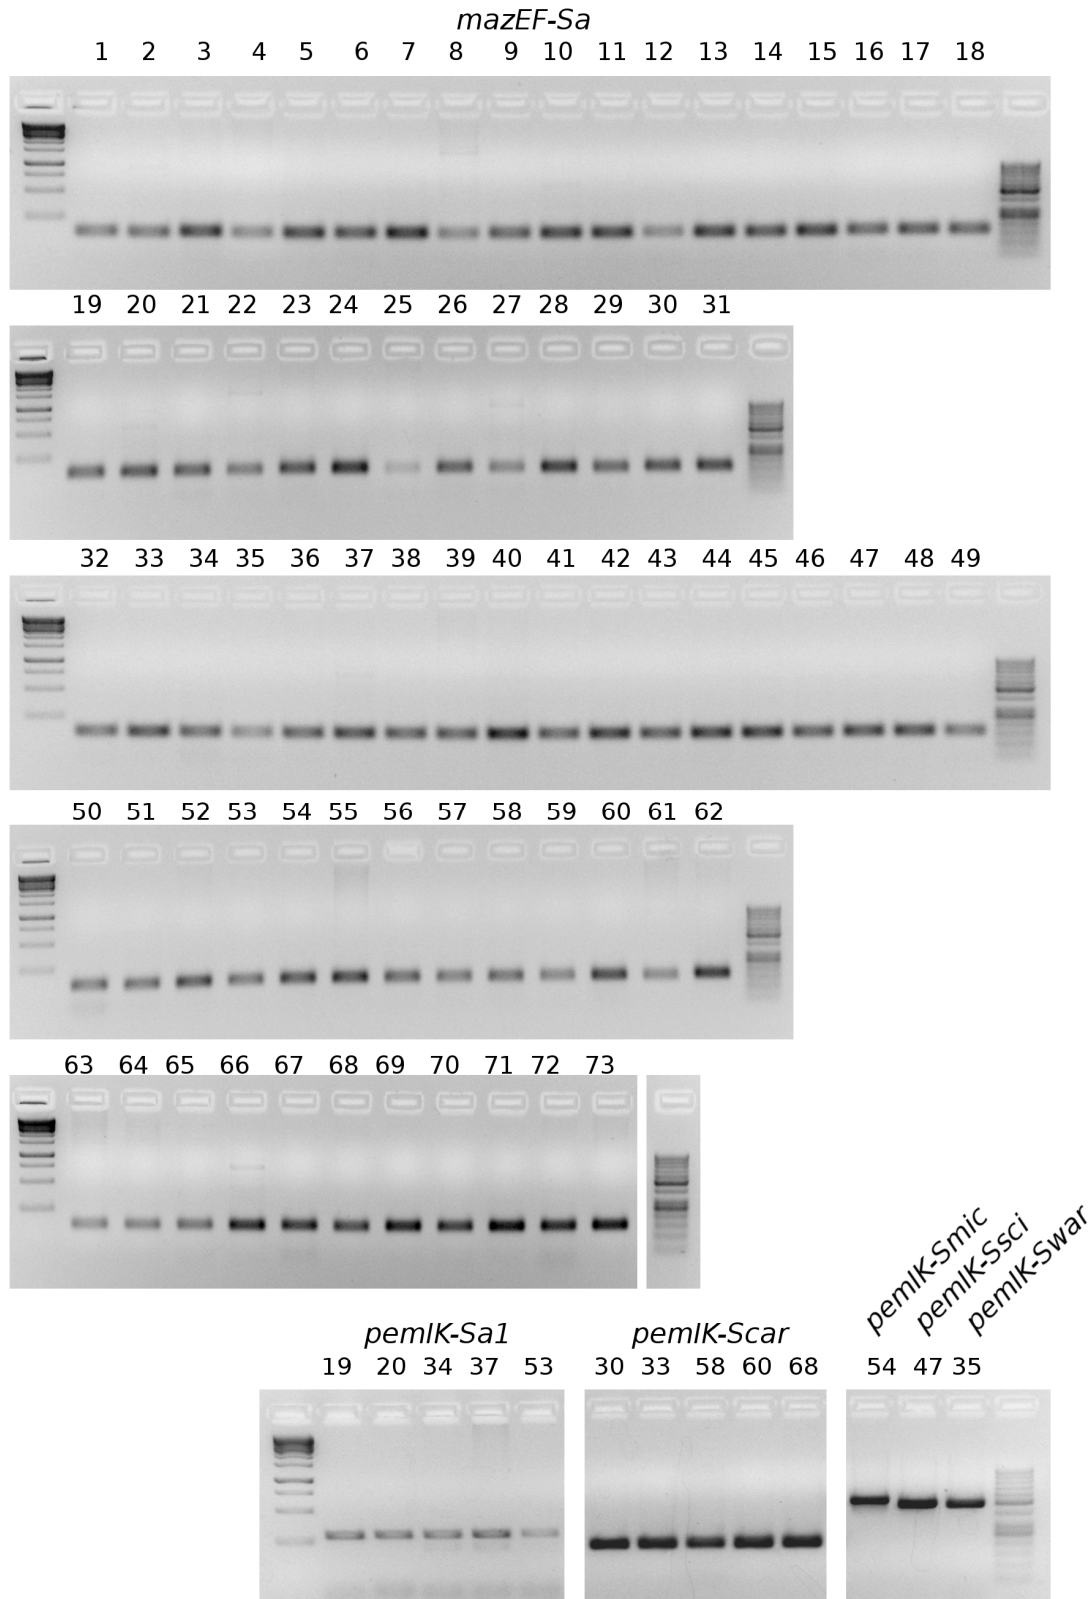

70 **Suppl. fig. 5.** Whole-lane images used for preparation of fig. 10: PCR screen for *mazEF/pemIK* loci. The  
 71 numbers correspond to the number in fig. 10. The first and the last lane: length standards, respectively Gene  
 72 Ruler 1 kb and Gene Ruler 50 bp (Thermocientific). White gaps: irrelevant lanes were removed. All  
 73 fragments in one row are fragments of the same gel image.  
 74

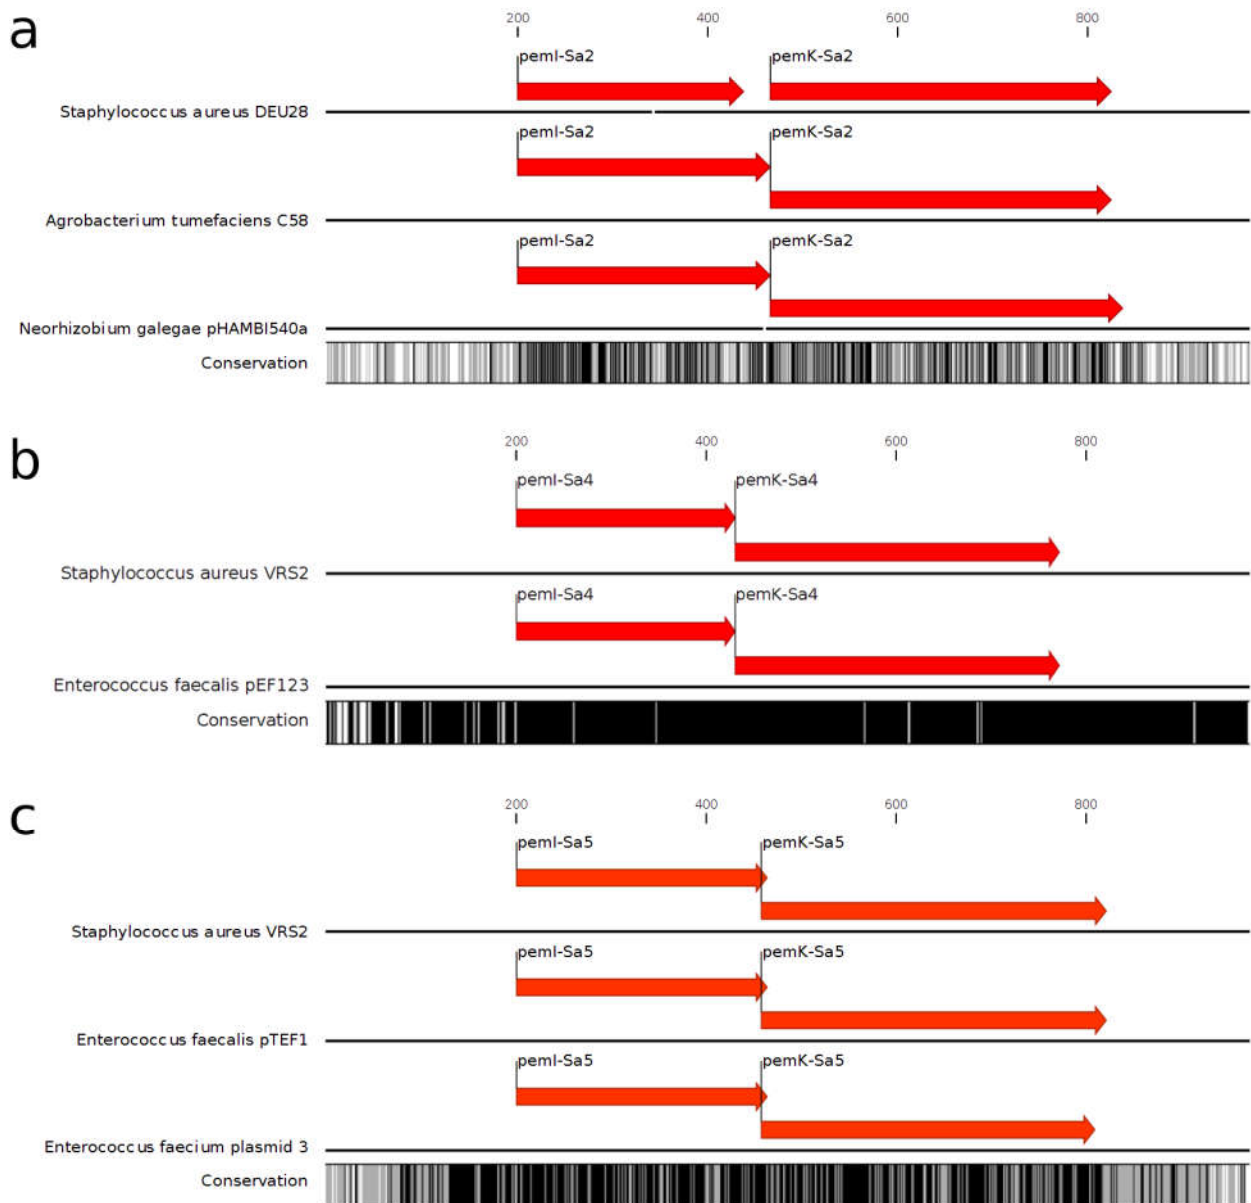

75

76 **Suppl. fig. 6.** Conservation of nucleotide sequences of different *pemIK* loci occurring in *S. aureus* and other  
 77 species. The conservation scale ranges from 50% to 100% (white to black). Each fragment is ~ 1 kb long,  
 78 the bp ruler is placed above each alignment. In all cases higher conservation is observed within the coding  
 79 sequences, which when translated are more than 80% similar. The adjacent non-coding sequences are more  
 80 diverse, likely due to variability in species-specific promoter and other regulatory sequences. **(a)** *pemIK-Sa2*  
 81 loci are the most divergent, still much higher conservation of coding sequences is clearly visible. **(b)** On the  
 82 other hand, although *pemIK-Sa4* sequences are highly conserved, there are clear differences in 5'-UTRs. **(c)**  
 83 *pemIK-Sa5* loci are more diverse than co-occurring with them *pemIK-Sa4* ones and as in other cases higher  
 84 variability in non-coding sequences is observed.



85 **Bibliography**

86

87 1. Saitou N, Nei M. The neighbor-joining method: a new method for reconstructing phylogenetic trees. Mol  
88 Biol Evol. 1987;4(4):406–25.

89 2. Nei M, Kumar S. Molecular Evolution and Phylogenetics. Oxford University Press; 2000.

90 3. Whelan S, Goldman N. A general empirical model of protein evolution derived from multiple protein  
91 families using a maximum-likelihood approach. Mol Biol Evol. 2001;18(5):691–9.
